# Supplementary material for: Electrodeposited cobalt phosphide superstructures for solar-driven thermoelectrocatalytic overall water splitting
Source: Royal Society of Chemistry journal article supplement (doi:10.1039/c7ta04719c), 2017-01-01
Supplement: c7ta04719c1.pdf [file c7ta04719c1.pdf]

## Experimental

### *Materials*

Sodium hypophosphite monohydrate ( $\text{NaH}_2\text{PO}_2 \cdot \text{H}_2\text{O}$ ), metal precursors including cobalt chloride hexahydrate ( $\text{CoCl}_2 \cdot 6\text{H}_2\text{O}$ ), cobalt nitrate hexahydrate [ $\text{Co}(\text{NO}_3)_2 \cdot 6\text{H}_2\text{O}$ ], cobalt acetate tetrahydrate [ $\text{Co}(\text{CH}_3\text{COO})_2 \cdot 4\text{H}_2\text{O}$ ], iron nitrate nonahydrate [ $\text{Fe}(\text{NO}_3)_3 \cdot 9\text{H}_2\text{O}$ ] and nickel nitrate hexahydrate [ $\text{Ni}(\text{NO}_3)_2 \cdot 6\text{H}_2\text{O}$ ] were purchased from Sigma-Aldrich Corporation. All chemicals were used as received without purification. Metal substrates, such as nickel foams (NF) and copper foils, were purchased from standard sources. Prior to use, these substrates were cut into pieces ( $1 \text{ cm} \times 1.5 \text{ cm}$ ), rinsed successively with acetone, ethanol and deionized water by ultrasonication to remove the impurities, and finally blown-dry with nitrogen gas.

### *Electrodeposition of $\text{Co}_2\text{P}$ on NF*

0.01 M of metal precursor and 0.1 M of  $\text{NaH}_2\text{PO}_2 \cdot \text{H}_2\text{O}$  were mixed in 20 mL of deionized water and magnetically stirred for 15 min to form a clear precursor solution. Electrodeposition of cobalt phosphides was performed on a CHI 660D electrochemical workstation under room temperature. A three-electrode configuration was used, in which the washed NF was directly used as the working electrode (the geometric area exposed to the solution was  $\sim 1.0 \text{ cm}^2$ ), a platinum (Pt) foil as the counter electrode and a saturated calomel electrode (SCE) as the reference electrode. A potential of  $-1.0 \text{ V}$  vs. SCE was applied for the electrodeposition for 10 min. Subsequently, the as-deposited NF was taken out from the solution, rinsed thoroughly with deionized water and then blown-dry with nitrogen gas for further use. Cobalt phosphides electrodeposited from cobalt chloride hexahydrate, cobalt acetate tetrahydrate and cobalt nitrate hexahydrate were named as  $\text{Co}_2\text{P}(\text{C})$ ,  $\text{Co}_2\text{P}(\text{A})$  and  $\text{Co}_2\text{P}(\text{N})$ , respectively, after the initials of the anions of cobalt precursors. Other  $\text{Co}_2\text{P}$  structures were synthesized for comparison by the same synthetic conditions, except that the concentration of  $\text{CoCl}_2 \cdot 6\text{H}_2\text{O}$  was increased to 0.05, 0.1 and 0.2 M.

### *Characterizations*

Scanning electron microscopy (SEM) images were taken on a JEOL JSM-7001F field-emission scanning electron microscope. High-resolution transmission electron microscopy (HRTEM) images were acquired on a Philips CM300 transmission electron microscope. X-ray diffraction (XRD) spectrum was achieved on a Philips X-ray diffractometer with  $\text{Cu K}\alpha$  radiation ( $\lambda = 1.541 \text{ \AA}$ ), in which the samples electrodeposited on a copper foil was used due to its flat surface. X-ray photoelectron spectroscopy (XPS) spectra were obtained on a VG Thermo Escalab 220i-XL X-ray photoelectron spectroscopy system. Element analysis was performed on an Oxford Instruments energy dispersive X-

ray (EDX) spectroscopy. Ultraviolet-visible (UV-vis) absorption spectra were attained on a Shimadzu UV-3600 UV-vis spectrophotometer, in which the Co<sub>2</sub>P(C)/NF and bare NF were directly used. Solar intensity was measured by a Daystar DS-05 solar meter under the real sun. Thermal images were taken by an FLIR E50 thermal imaging infrared camera.

### *Electrochemical measurements*

All the electrochemical measurements of the cobalt phosphides were recorded on a CHI 660D electrochemical work station, with 1 M KOH aqueous solution as the electrolyte. A three-electrode configuration was used, with Co<sub>2</sub>P/NF directly as the working electrode, a Pt foil as the counter electrode and an SCE as the reference electrode. Linear sweep voltammetry (LSV) curves were performed at a scan rate of 5 mV s<sup>-1</sup>. Cyclic voltammetry (CV) curves were measured at different scan rates of 10, 20, 50, 100 and 200 mV s<sup>-1</sup>. Electrochemical impedance spectra (EIS) were achieved in the frequency range of 0.01 to 100 kHz with 5 mV amplitude. Current density versus time (*i-t*) curves of Co<sub>2</sub>P(C) were carried out in 1 M KOH solution at their respective overpotentials. The measurements under the real sun were carried out from 10:00 to 11:00 am on 27th October 2016 (the ambient temperature is 32 °C). The as-measured potentials were converted to reversible hydrogen electrode (RHE) based on the following equation:

$$E_{\text{RHE}} (\text{V}) = E_{\text{SCE}} (\text{V}) + E^0_{\text{SCE}} + 0.059 \times \text{pH}$$

$E^0_{\text{SCE}}$  is actually temperature-dependent, as shown in Table S1 below:

**Table S1**  $E^0_{\text{SCE}}$  at different temperatures

| T (°C) | $E^0_{\text{SCE}}$ |
|--------|--------------------|
| 25     | 0.241              |
| 35     | 0.234              |
| 45     | 0.227              |
| 55     | 0.220              |
| 65     | 0.212              |

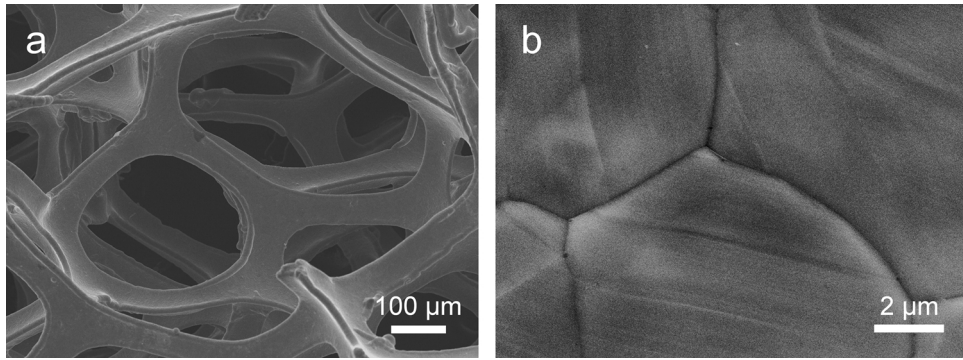

**Fig. S1** (a) Low- and (b) high-magnification SEM images of bare NF.

Bare nickel foam (NF) presents a macro-porous framework with smooth surface.

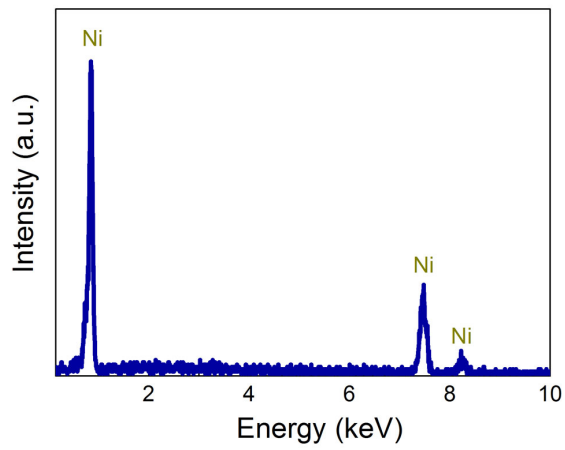

**Fig. S2** EDX spectrum of bare NF.

EDX spectrum indicates that bare NF contains Ni element only.

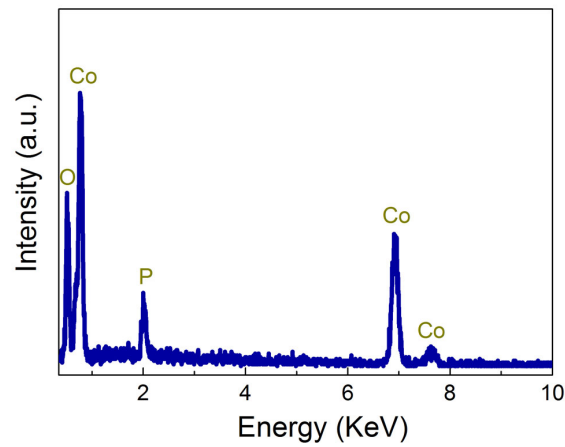

**Fig. S3** EDX spectrum of Co<sub>2</sub>P(C) powder removed from the underlying substrate.

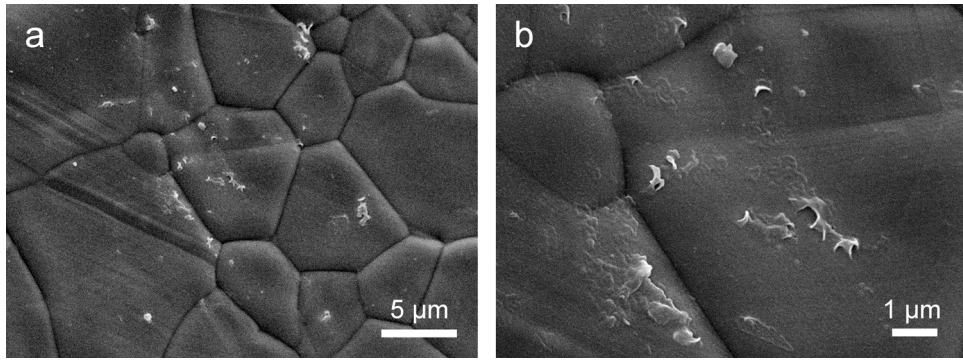

**Fig. S4** (a) Low- and (b) high-magnification SEM images of NF immersed in the same electrodeposition precursor solution for 10 min without applied potentials.

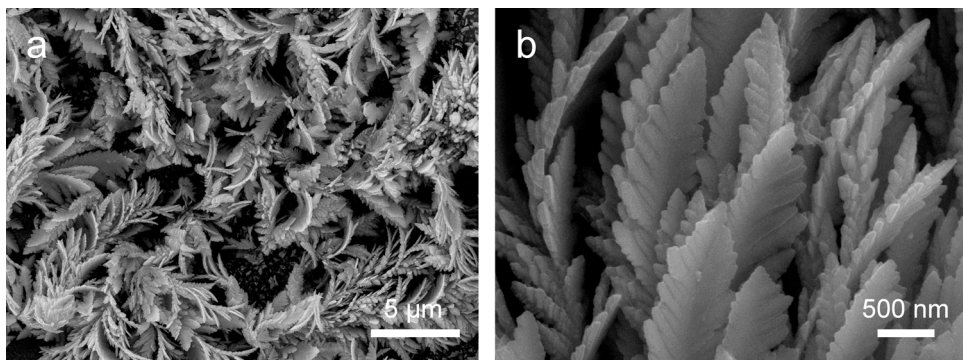

**Fig. S5** (a) Low- and (b) high-magnification SEM images of  $\text{Co}_2\text{P(A)}$ .

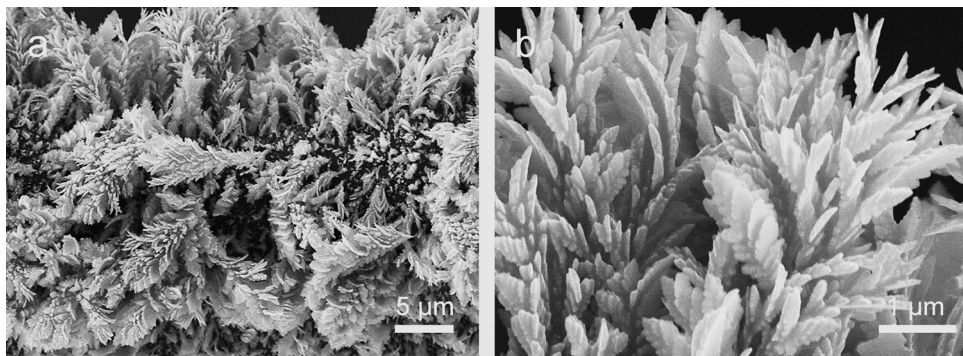

**Fig. S6** (a) Low- and (b) high-magnification SEM images of  $\text{Co}_2\text{P(N)}$ .

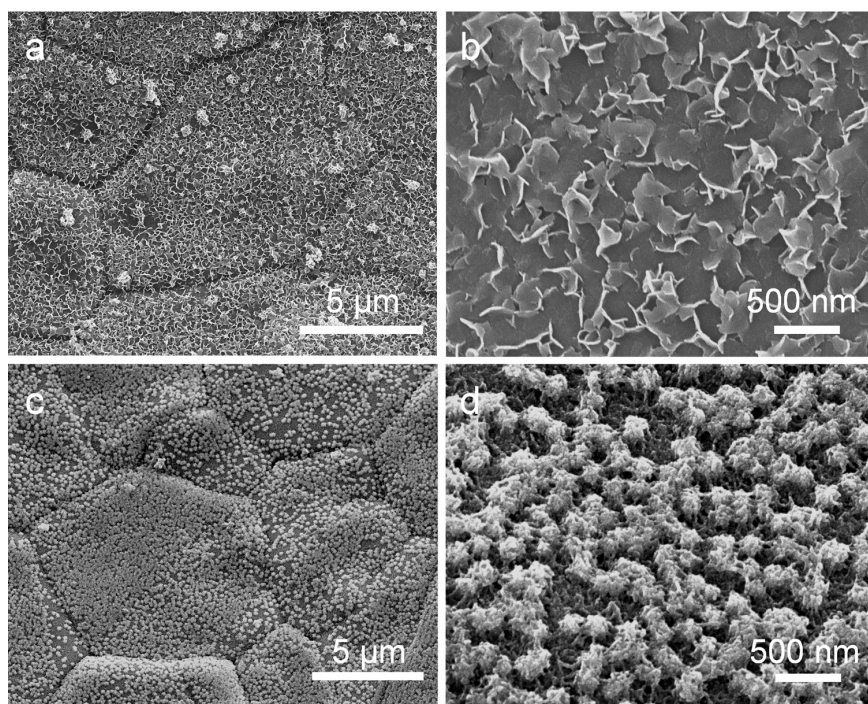

**Fig. S7** Low- and high-magnification SEM images of (a,b) iron phosphide nanosheets and (c,d) nickel phosphide nanoclusters.

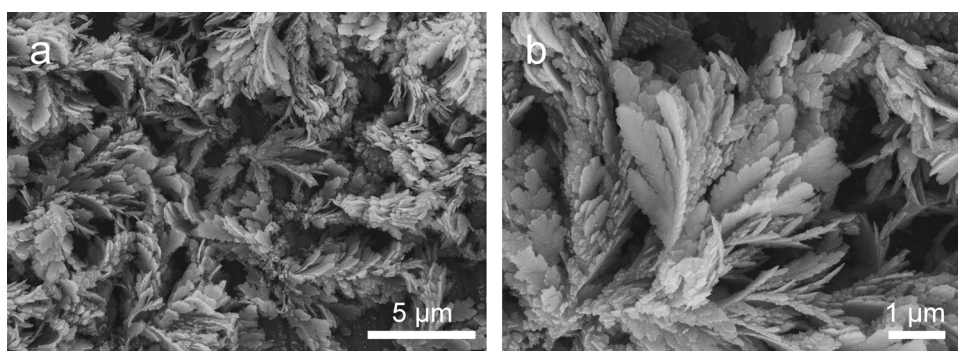

**Fig. S8** (a) Low- and (b) high-magnification SEM images of  $\text{Co}_2\text{P(N)}$  electrodeposited on a copper foil.

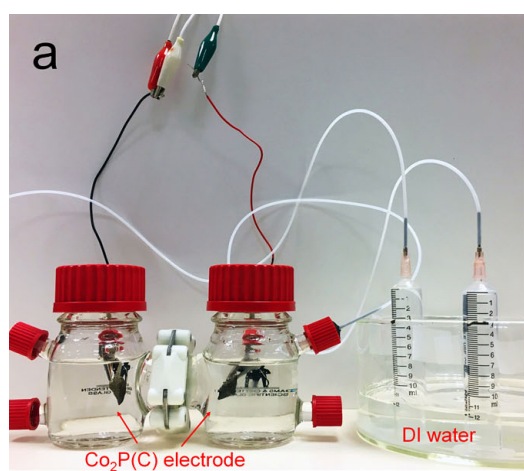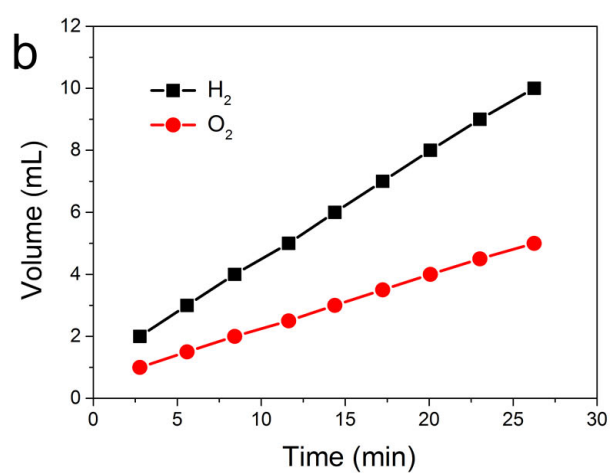

**Fig. S9** (a) Digital photos of the overall water splitting setup with  $\text{Co}_2\text{P(C)}$  as both cathode and anode (1 M KOH electrolyte). (b) The volume of the generated gases with reaction time.

The overall water splitting setup comprises of two quartz bottles that are well connected by a thin Nafion membrane, each containing a  $\text{Co}_2\text{P}(\text{C})$  electrode, one as cathode and the other as anode. Two sealed syringes connecting to the cathode and anode bottle, respectively, were used to collect the generated gas.

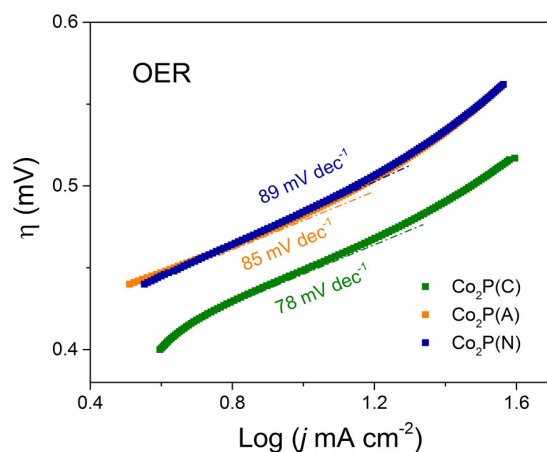

**Fig. S10** OER Tafel plots of different  $\text{Co}_2\text{P}$  measured in 1 M KOH electrolyte under room temperature.

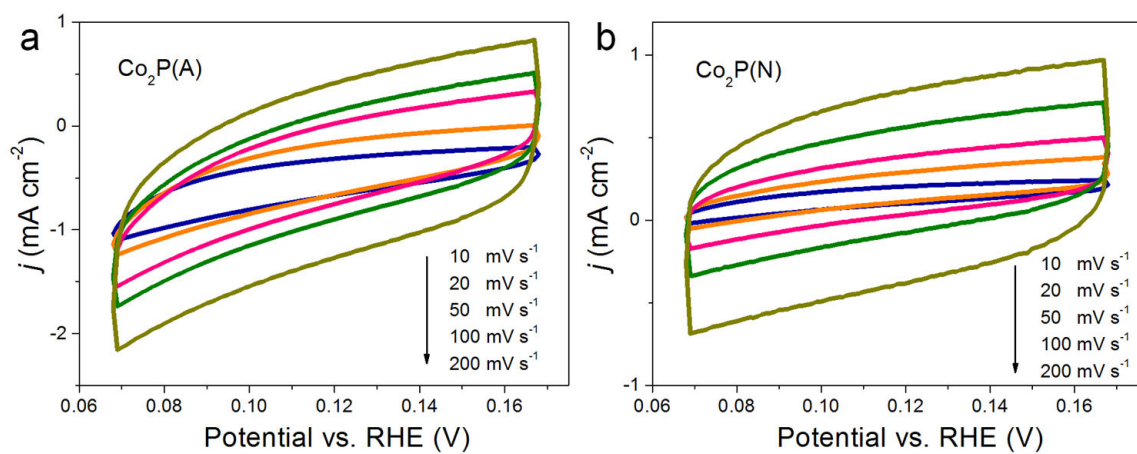

**Fig. S11** CV curves of (a)  $\text{Co}_2\text{P}(\text{A})$  and (b)  $\text{Co}_2\text{P}(\text{N})$  at various scan rates of 10, 20, 50, 100 and 200  $\text{mV s}^{-1}$ .

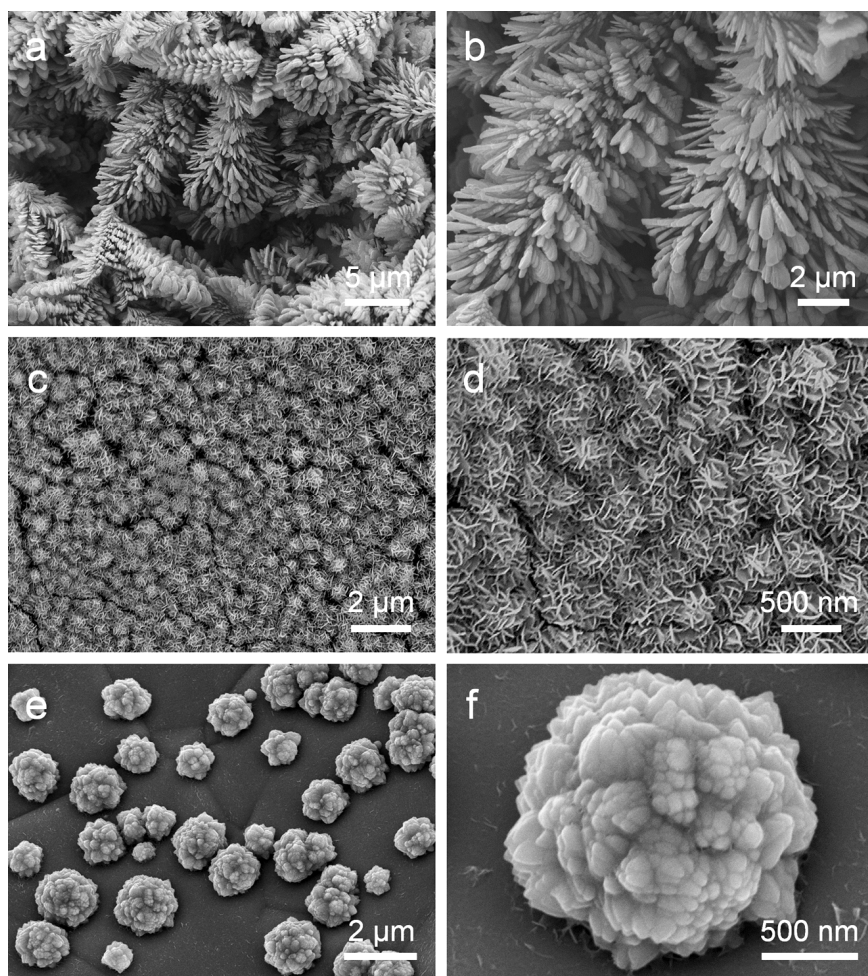

**Fig. S12** Low- and high-magnification SEM images of  $\text{Co}_2\text{P}$  obtained at different  $\text{CoCl}_2 \cdot 6\text{H}_2\text{O}$  concentrations of (a,b) 0.05 M, (c,d) 0.1 M and (e,f) 0.2 M.

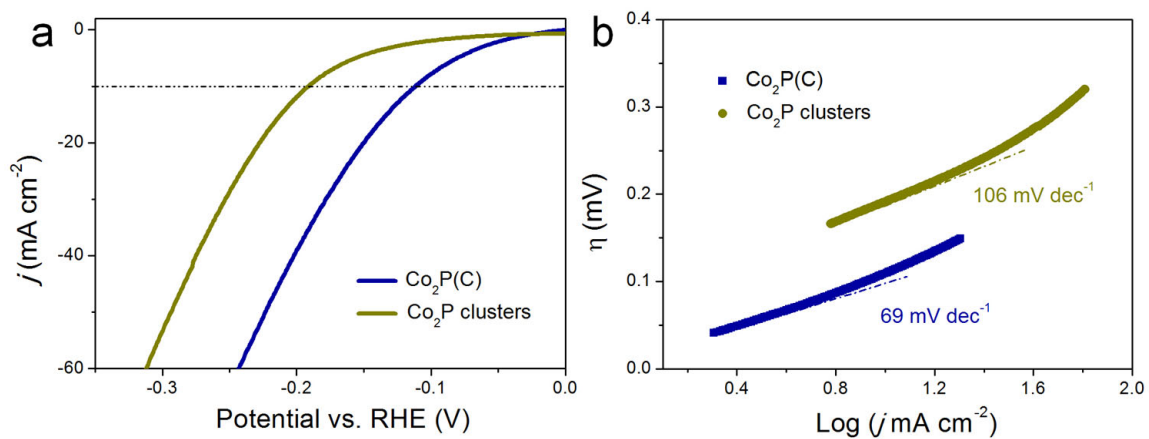

**Fig. S13** (a) HER LSV curves and (b) Tafel plots of  $\text{Co}_2\text{P}(\text{C})$  and  $\text{Co}_2\text{P}$  clusters (1 M KOH, room temperature).

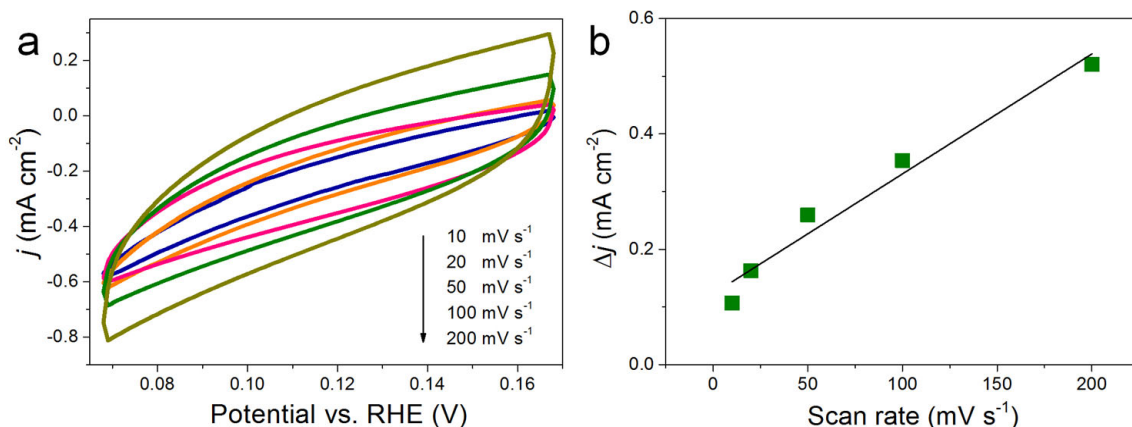

**Fig. S14** (a) CV curves of Co<sub>2</sub>P clusters at various scan rates of 10, 20, 50, 100 and 200 mV s<sup>-1</sup>. (b) Charging current density differences of Co<sub>2</sub>P clusters plotted against the scan rates.

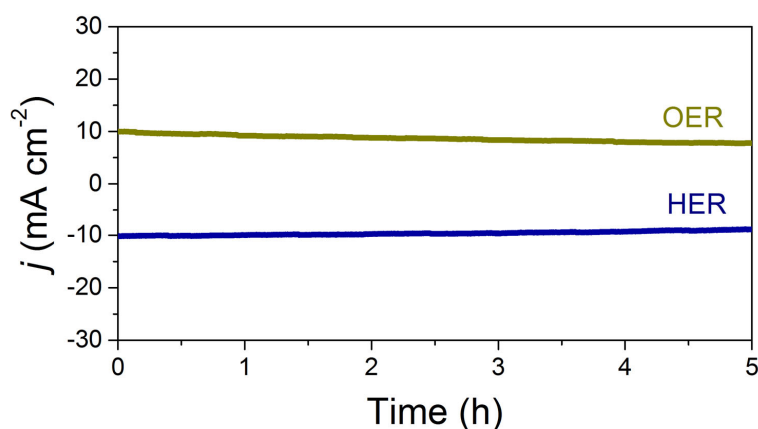

**Fig. S15** Time-dependent current density curves of Co<sub>2</sub>P(C) measured under a static overpotential of 108 mV for HER and 440 mV for OER (1 M KOH).

Co<sub>2</sub>P(C) can maintain up to 95% (HER) and 86% (OER) of its current density at 10 mA cm<sup>-2</sup> after 5 hours, demonstrating its good durability.

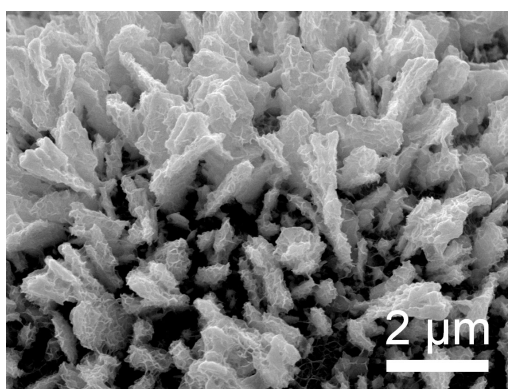

**Fig. S16** SEM image of Co<sub>2</sub>P(C) after long-term measurements.

The superstructures of Co<sub>2</sub>P(C) are mostly retained after electrocatalytic measurements in 1 M KOH for 5 h.



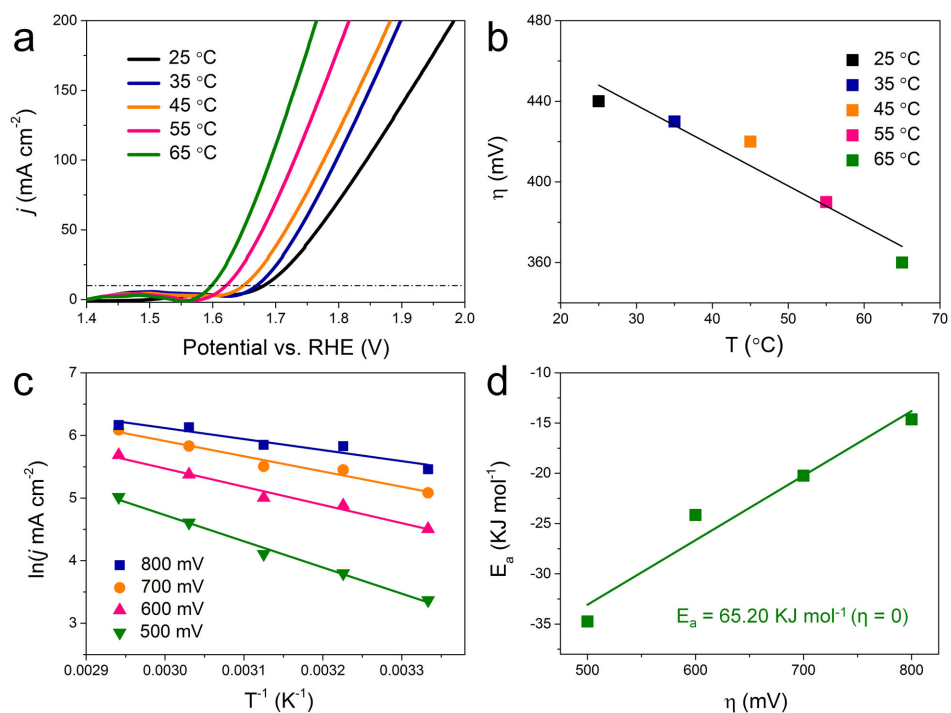

**Fig. S17** (a) OER LSV curves of Co<sub>2</sub>P(C) measured under the real sun (1 M KOH electrolyte). (b) The decrease of overpotential ( $j = 10 \text{ mA cm}^{-2}$ ) with the increase of temperature. (c) Semilogarithmic dependence of current density versus temperature (Arrhenius plots) at overpotentials of 500, 600, 700 and 800 mV. (d) Linearly fitted activation energy curve of Co<sub>2</sub>P(C).

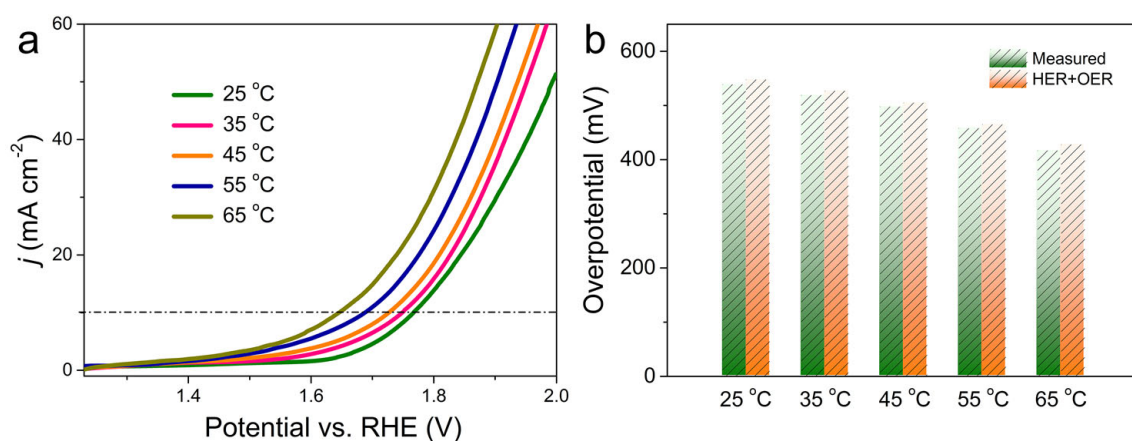

**Fig. 18** (a) LSV curves of Co<sub>2</sub>P(C) overall water splitting under room temperature and increased temperatures heated from solar irradiation. (b) Comparison of the measured overpotentials of overall water splitting and separately measured HER and OER overpotentials.

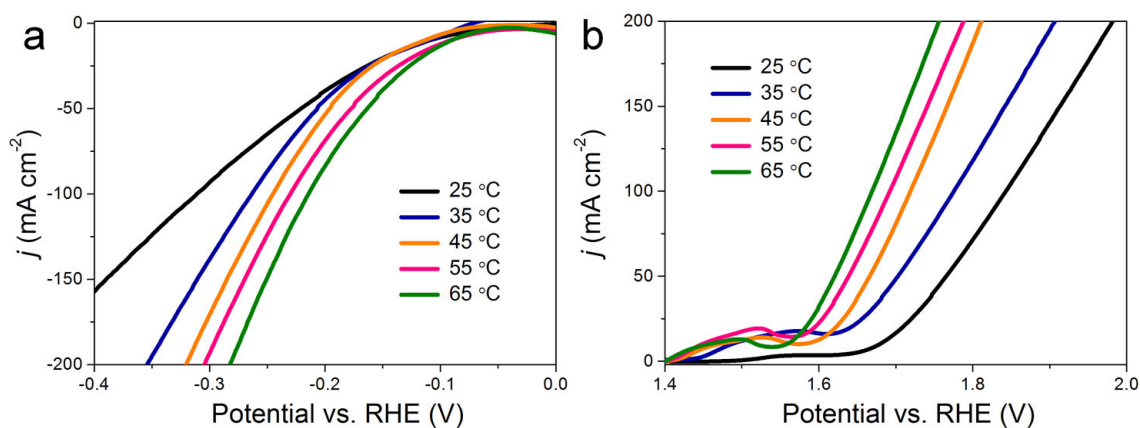

**Fig. S19** (a) HER and (b) OER LSV curves of Co<sub>2</sub>P(C) measured under different temperatures directly heated by water bath (1 M KOH).

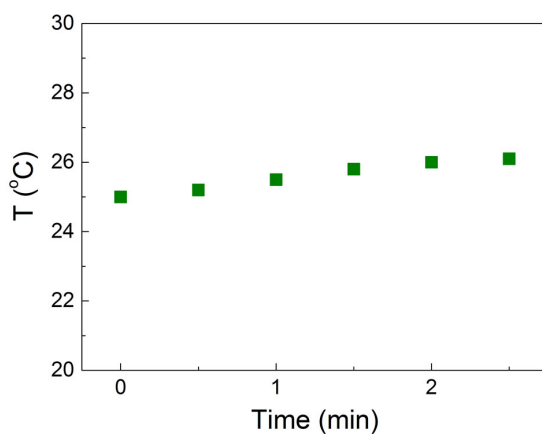

**Fig. S20** The temperatures of KOH electrolyte illuminated by a full-spectrum LED lamp under room temperature.

The full-spectrum LED lamp causes a temperature increase of less than 1 °C, which can be considered negligible for the electrocatalysis.

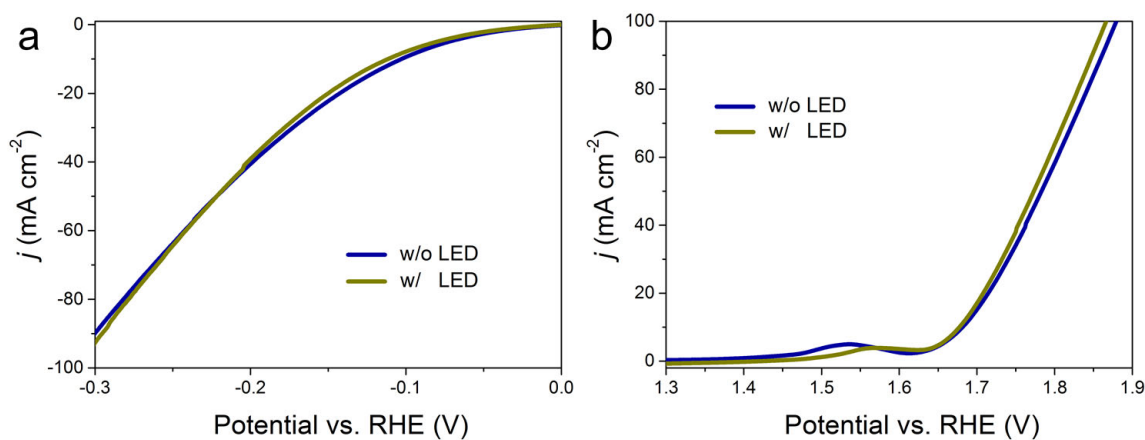

**Fig. S21** (a) HER and (b) OER LSV curves of Co<sub>2</sub>P(C) measured with and without the irradiation of a full-spectrum LED (room temperature).

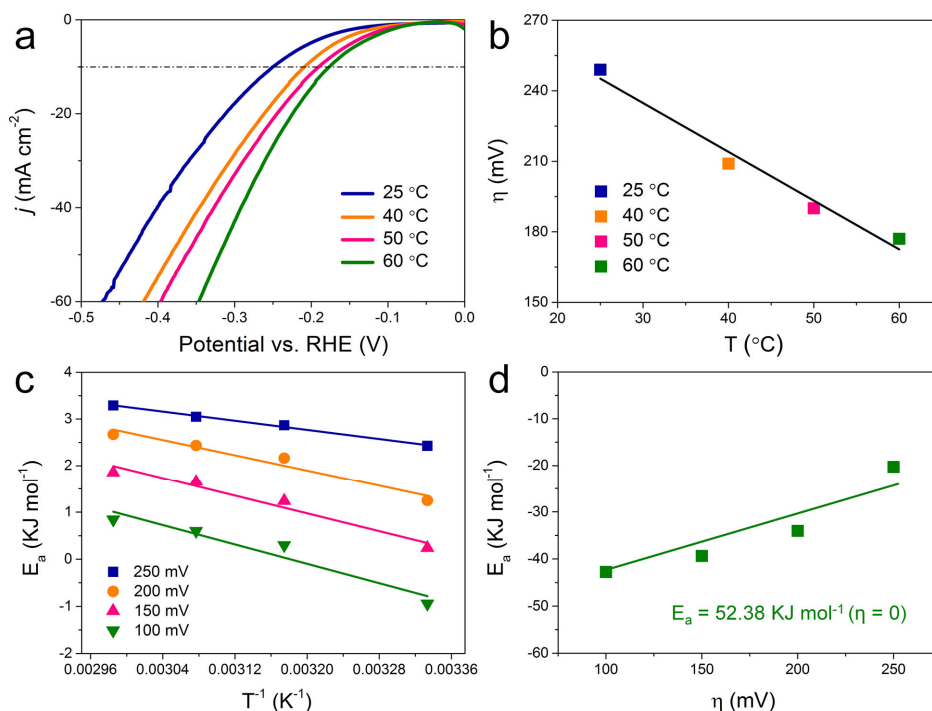

**Fig. S22** (a) HER LSV curves of bare NF measured under natural sunlight (1 M KOH electrolyte). (b) The decrease of overpotential ( $j = 10 \text{ mA cm}^{-2}$ ) with the increase of temperature. (c) Semilogarithmic dependence of current density versus temperature (Arrhenius plots) at overpotentials of 100, 150, 200 and 250 mV. (d) Linearly fitted activation energy curve of bare NF.

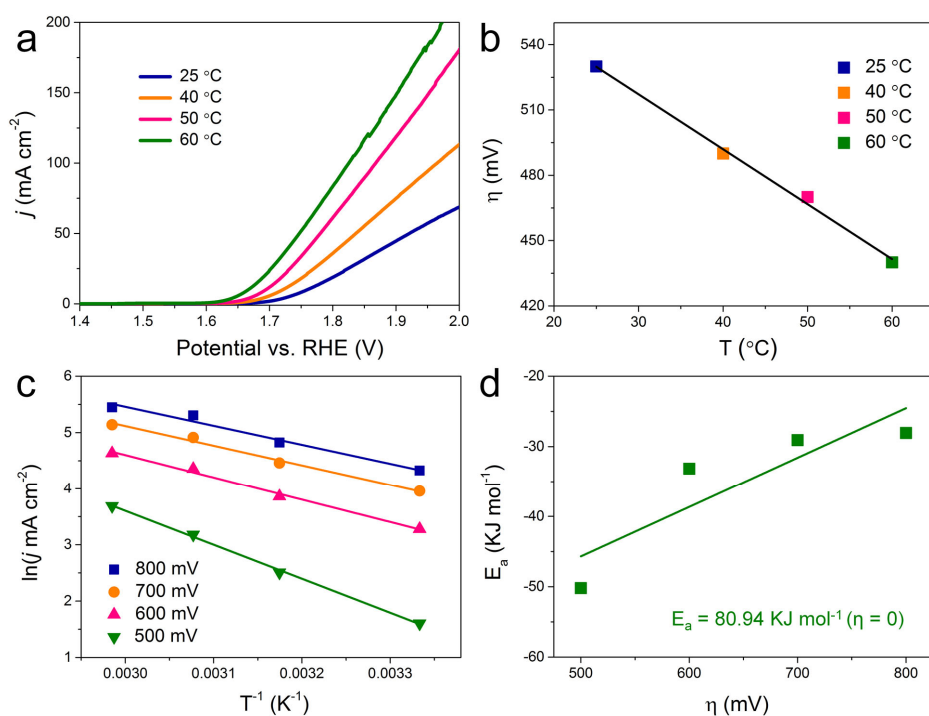

**Fig. S23** (a) OER LSV curves of bare NF measured under natural sunlight (1 M KOH electrolyte). (b) The decrease of overpotential ( $j = 10 \text{ mA cm}^{-2}$ ) with the increase of temperature. (c) Semilogarithmic dependence of current density versus temperature (Arrhenius plots) at overpotentials of 500, 600, 700 and 800 mV. (d) Linearly fitted activation energy curve of bare NF.

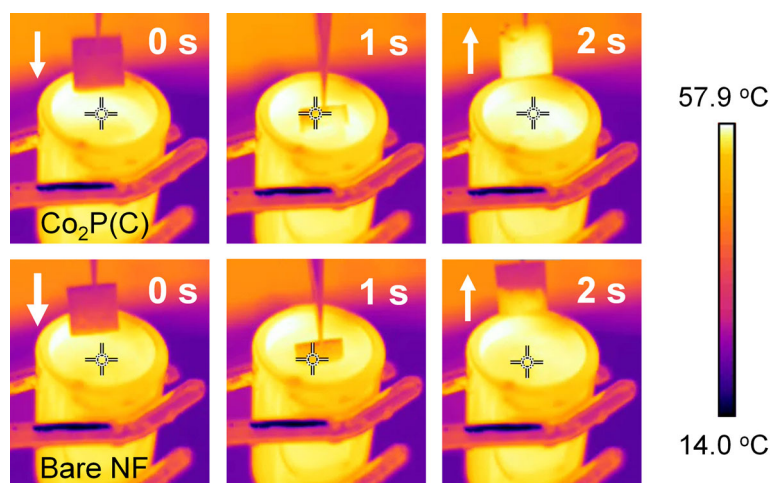

**Fig. S24** Thermal images of (top) Co<sub>2</sub>P(C) and (bottom) bare NF taken out from hot KOH electrolyte.

**Table S2** A comparison of the HER activity of Co<sub>2</sub>P(C) superstructures with recently reported phosphide-based electrocatalysts measured in alkaline media

| Catalyst                                             | Substrate               | Electrolyte | $\eta$ (mV) at 10 mA cm <sup>-2</sup> | Tafel slope (mV dec <sup>-1</sup> ) | Reference                                                         |
|------------------------------------------------------|-------------------------|-------------|---------------------------------------|-------------------------------------|-------------------------------------------------------------------|
| Cobalt phosphide films                               | Ni                      | 0.1 M KOH   | 411                                   | 147                                 | <i>RSC Adv.</i> , 2015, <b>5</b> , 105814-105819                  |
|                                                      | Ti                      |             | 577                                   | 121                                 |                                                                   |
|                                                      | Au                      |             | 312                                   | 100                                 |                                                                   |
| Ni <sub>2</sub> P microsphere/Ni superstructures     | Ni foam                 | 1 M KOH     | 98                                    | 72                                  | <i>ACS Catal.</i> , 2016, <b>6</b> , 714-721                      |
| Cobalt phosphide nanosheets/carbon                   | Glassy carbon electrode | 1 M KOH     | 111                                   | 70.9                                | <i>Green Chem.</i> , 2016, <b>18</b> , 2287-2295                  |
| Ni-modified cobalt phosphide nanoparticles           | Glassy carbon electrode | 1 M KOH     | 180                                   | 63                                  | <i>J. Mater. Chem. A</i> , 2016, <b>4</b> , 7549-7554             |
| Co-P film                                            | Cu foil                 | 1 M KOH     | 94                                    | 42                                  | <i>Angew. Chem. Int. Ed.</i> , 2015, <b>54</b> , 6251-6254        |
| CoP nanoneedle arrays                                | Carbon cloth            | 1 M KOH     | 95                                    | 69                                  | <i>ChemSusChem</i> , 2016, <b>9</b> , 472-477                     |
| Co <sub>2</sub> P film                               | Co foil                 | 1M KOH      | 183                                   | N/A                                 | <i>ACS Appl. Mater. Interfaces</i> , 2016, <b>8</b> , 12798-12803 |
| NiFeP                                                | NiFe foil               | 1M KOH      | 255                                   | N/A                                 | <i>ACS Appl. Mater. Interfaces</i> , 2016, <b>8</b> , 12798-12803 |
| Ni <sub>3</sub> P <sub>4</sub> film                  | Ni foil                 | 1M KOH      | 150                                   | 53                                  | <i>Angew. Chem. Int. Ed.</i> , 2015, <b>54</b> , 12361-12365      |
| CoP nanoparticles                                    | Ti foil                 | 1M KOH      | ~170                                  | N/A                                 | <i>Nano Energy</i> , 2016, <b>29</b> , 37-45                      |
| Nickel phosphides                                    | Carbon fibre paper      | 1 M KOH     | 160                                   | 107.3                               | <i>ACS Appl. Mater. Interfaces</i> , 2016, <b>8</b> , 10826-10834 |
| Co <sub>2</sub> P encapsulated in N,P-doped graphene | Glassy carbon electrode | 1M KOH      | ~180                                  | 96                                  | <i>Nano Lett.</i> , 2016, <b>16</b> , 4691-4698                   |
| FeP nanorod arrays                                   | Carbon cloth            | 1M KOH      | ~220                                  | 146                                 | <i>ACS Catal.</i> , 2014, <b>4</b> , 4065-4069                    |
| Cobalt phosphide nanowire arrays                     | Carbon cloth            | 1M KOH      | 209                                   | 129                                 | <i>J. Am. Chem. Soc.</i> , 2014, <b>136</b> , 7587-7590           |

**Table S3** A comparison of the OER activity of Co<sub>2</sub>P(C) superstructures with recently reported phosphide-based electrocatalysts measured in alkaline media

| Catalyst                                                            | Substrate               | Electrolyte | $\eta$ (mV) at 10 mA cm <sup>-2</sup> | Tafel slope (mV dec <sup>-1</sup> ) | Reference                                                         |
|---------------------------------------------------------------------|-------------------------|-------------|---------------------------------------|-------------------------------------|-------------------------------------------------------------------|
| Cobalt phosphide/ cobalt nitride embedded nitrogen-rich nanocarbons | Glassy carbon electrode | 0.1 M KOH   | 390                                   | 78                                  | <i>J. Mater. Chem. A</i> , 2016, <b>4</b> , 10575-10584           |
| CoP hollow polyhedron                                               | Glass carbon electrode  | 1 M KOH     | 400                                   | 57                                  | <i>ACS Appl. Mater. Interfaces</i> , 2016, <b>8</b> , 2158-2165   |
| Co <sub>2</sub> P film                                              | Co foil                 | 1 M KOH     | 367                                   | N/A                                 | <i>ACS Appl. Mater. Interfaces</i> , 2016, <b>8</b> , 12798-12803 |
| Porous nickel phosphide nanoplates                                  | Glass carbon electrode  | 1 M KOH     | 300                                   | 64                                  | <i>Energy Environ. Sci.</i> , 2016, <b>9</b> , 1246-1250          |
| Co-P film                                                           | Cu foil                 | 1 M KOH     | 345                                   | 47                                  | <i>Angew. Chem. Int. Ed.</i> , 2015, <b>54</b> , 6251-6254        |
| CoP NPs                                                             | Glass carbon electrode  | 1 M KOH     | 342                                   | 90                                  | <i>ChemElectroChem</i> , 2016, <b>3</b> , 719-725                 |
| CoP nanoneedle arrays                                               | Carbon cloth            | 1 M KOH     | 281                                   | N/A                                 | <i>ChemSusChem</i> , 2016, <b>9</b> , 472-477                     |
| Co <sub>2</sub> P nanoneedles                                       | Glass carbon electrode  | 1 M KOH     | 310                                   | 50                                  | <i>ACS Energy Lett.</i> , 2016, <b>1</b> , 169-174                |
| Nickel phosphides                                                   | Carbon fibre paper      | 1 M KOH     | 320                                   | 72.2                                | <i>ACS Appl. Mater. Interfaces</i> , 2016, <b>8</b> , 10826-10834 |
| (Co <sub>1-x</sub> Fe <sub>x</sub> ) <sub>2</sub> P ribbons         | Co-Fe-P ingot           | 1 M KOH     | 270                                   | 40                                  | <i>Energy Environ. Sci.</i> , 2016, <b>9</b> , 2257-2261          |
| CoP nanowires                                                       | Ti mesh                 | 1 M KOH     | 310                                   | 87                                  | <i>Nanotechnology</i> , 2016, <b>27</b> , 23LT01                  |
| Porous cobalt phosphide/graphitic carbon polyhedral hybrid          | Glassy carbon electrode | 1 M KOH     | 345                                   | 56                                  | <i>J. Mater. Chem. A</i> , 2016, <b>4</b> , 13742-13745           |
| Ni-modified cobalt phosphide nanoparticles                          | Glassy carbon electrode | 1 M KOH     | 360                                   | 82                                  | <i>J. Mater. Chem. A</i> , 2016, <b>4</b> , 7549-7554             |
